# Supplementary material for: Costs and Cost Effectiveness of Three Approaches for Cervical Cancer Screening among HIV-Positive Women in Johannesburg, South Africa
Source: PubMed Central journal article supplement (PMC4646665; doi:10.1371/journal.pone.0141969), 2015-11-16
Supplement: pone.0141969.s001.pdf [file pone.0141969.s001.pdf]

S Table 1. Colposcopic biopsy (gold standard) results from validation study

|                                                 | Colpo  |        |        |
|-------------------------------------------------|--------|--------|--------|
|                                                 | Base   | Low    | High   |
| Total women with colpo in study                 | 941    |        |        |
| Total positive results                          | 310    |        |        |
| "True" prevalence of CIN 2+ in study population | 32.94% | 30.01% | 36.01% |

S Table 2. Screening methods - sensitivity and specificity from validation study

|                              | VIA                                                                       |       |       | HPV   |       |       | Pap 1                                                                     |       |       | Pap 2 |       |       |
|------------------------------|---------------------------------------------------------------------------|-------|-------|-------|-------|-------|---------------------------------------------------------------------------|-------|-------|-------|-------|-------|
|                              | Where normal/negative = normal/LSIL/ASCUC and positive = HSIL, ASC-H, SCC |       |       |       |       |       | Where normal/negative = normal and positive = LSIL/ASCUS/HSIL, ASC-H, SCC |       |       |       |       |       |
|                              | Base                                                                      | Low   | High  | Base  | Low   | High  | Base                                                                      | Low   | High  | Base  | Low   | High  |
| Adjusted sensitivity (CIN2+) | 65.4%                                                                     | 59.7% | 71.1% | 91.9% | 88.5% | 95.3% | 75.8%                                                                     | 70.8% | 80.8% | 94.8% | 90.5% | 99.2% |
| Adjusted specificity (CIN2+) | 68.5%                                                                     | 65.3% | 71.7% | 51.4% | 48.0% | 54.8% | 83.4%                                                                     | 80.9% | 85.9% | 35.6% | 32.2% | 38.9% |
| PPV                          | 50.5%                                                                     | 45.8% | 55.2% | 48.2% | 45.5% | 50.9% | 69.2%                                                                     | 64.6% | 73.8% | 42.0% | 39.6% | 44.4% |
| NPV                          | 80.1%                                                                     | 76.7% | 83.5% | 92.8% | 89.5% | 96.0% | 87.5%                                                                     | 84.9% | 90.1% | 93.3% | 87.3% | 99.0% |
| Slide positivity rate        | 42.7%                                                                     | 42.9% | 42.4% | 62.9% | 64.0% | 61.7% | 36.1%                                                                     | 36.1% | 36.1% | 74.4% | 75.3% | 73.7% |

S Table 3. Total average costs, cost breakdowns and sensitivity analysis levers

|                                                        | VIA  |    | HPV DNA |    | Pap  |    |
|--------------------------------------------------------|------|----|---------|----|------|----|
| Personnel                                              | 1.56 | 0% | 1.39    | 0% | 1.43 | 0% |
| Supplies                                               | 1.24 | 0% | 0.76    | 0% | 1.03 | 0% |
| Equipment                                              | 0.88 | 0% | 0.46    | 0% | 0.50 | 0% |
| Lab                                                    | 0.00 | 0% | 51.74   | 0% | 5.21 | 0% |
| Total procedure cost                                   | 3.67 |    | 54.34   |    | 8.17 |    |
| <i>total comparison: sensitivity cost/cost summary</i> | 0%   |    | 0%      |    | 0%   |    |

S Table 4. Cost effectiveness calculations

|                                                    | VIA (nurse) |     |      | HPV   |     |      | Pap 1 |     |      | Pap 2 |     |      |
|----------------------------------------------------|-------------|-----|------|-------|-----|------|-------|-----|------|-------|-----|------|
|                                                    | Base        | Low | High | Base  | Low | High | Base  | Low | High | Base  | Low | High |
| <b>Full cohort from validation study</b>           |             |     |      |       |     |      |       |     |      |       |     |      |
| Total participants                                 | 1202        |     |      | 1202  |     |      | 1202  |     |      | 1202  |     |      |
| Inadequate sample                                  | 1           |     |      | 2     |     |      | 6     |     |      | 6     |     |      |
| % inadequate or inconclusive                       | 0.08%       |     |      | 0.17% |     |      | 0.50% |     |      | 0.50% |     |      |
| Number of women with results from screening method | 1201        |     |      | 1200  |     |      | 1196  |     |      | 1196  |     |      |
| True positive cases                                | 393         |     |      | 393   |     |      | 393   |     |      | 393   |     |      |
| True negative cases                                | 800         |     |      | 800   |     |      | 800   |     |      | 800   |     |      |

| Analytic cohort from validation study                        |       |       |       |         |        |         |        |        |        |        |        |        |
|--------------------------------------------------------------|-------|-------|-------|---------|--------|---------|--------|--------|--------|--------|--------|--------|
| Number of women with results from all screening methods      | 1193  |       |       | 1193    |        |         | 1193   |        |        | 1193   |        |        |
| Total cost for screening (no colpo) (US)                     | 4,383 | 3,287 | 5,478 | 64,826  | 48,619 | 81,032  | 9,750  | 7,313  | 12,188 | 9,750  | 7,313  | 12,188 |
| Positive cases with screening method                         | 509   | 512   | 506   | 750     | 764    | 736     | 431    | 431    | 430    | 888    | 898    | 879    |
| Negative cases with screening method                         | 684   | 681   | 687   | 443     | 429    | 457     | 762    | 762    | 763    | 305    | 295    | 314    |
| True positive cases detected                                 | 257   | 235   | 279   | 361     | 348    | 375     | 298    | 278    | 318    | 373    | 356    | 390    |
| <i>Option 2 - no colpo after VIA</i>                         |       |       |       |         |        |         |        |        |        |        |        |        |
| Total cost for colpo for all positive screens                | -     | -     | -     | 50,784  | 38,791 | 62,309  | 29,165 | 21,891 | 36,427 | 60,115 | 45,609 | 74,373 |
| Total cost for initial screen plus colpo for positive cases  | 4,383 | 3,287 | 5,478 | 115,610 | 87,410 | 143,341 | 38,915 | 29,204 | 48,615 | 69,865 | 52,922 | 86,561 |
| Colpo costs are x% of total                                  | 0.00% | 0.00% | 0.00% | 43.93%  | 44.38% | 43.47%  | 74.94% | 74.96% | 74.93% | 86.04% | 86.18% | 85.92% |
| Cost per true CIN2+ case detected (w/ or without/colpo)      | 17.05 | 14.01 | 19.61 | 320.09  | 251.31 | 382.71  | 130.63 | 104.95 | 153.09 | 187.52 | 148.79 | 222.02 |
| Wasted cost for colpo for false positives                    | -     | -     | -     | 26,327  | 21,126 | 30,606  | 8,992  | 7,760  | 9,548  | 34,886 | 27,546 | 41,373 |
| Proportion of total costs spent on colpo for false positives | 0.0%  | 0.0%  | 0.0%  | 22.8%   | 24.2%  | 21.4%   | 23.1%  | 26.6%  | 19.6%  | 49.9%  | 52.0%  | 47.8%  |

S Table 5a. Cost per case detected - option 2 - ICER CALCULATION STEP 1

|              | True cases detected | total cost | incremental cost | incremental cases | icer     | Cost per case detected |
|--------------|---------------------|------------|------------------|-------------------|----------|------------------------|
| No screening | 0                   | 0          | 0                | 0                 | 0        | 0                      |
| VIA          | 257                 | 4383       | 4383             | 257               | 17.05    | 17.05                  |
| Pap 1        | 298                 | 38915      | 34533            | 41                | 844.85   | 130.63                 |
| HPV          | 361                 | 115610     | 76695            | 63                | 1212.07  | 320.09                 |
| Pap 2        | 373                 | 69865      | -45745           | 11                | -4013.57 | 187.52                 |

S Table 5b. Cost per case detected - option 2 - ICER CALCULATION STEP 2

| Cost per case detected - option 2 | True cases detected | total cost | incremental cost | incremental cases | icer | Cost per case detected |
|-----------------------------------|---------------------|------------|------------------|-------------------|------|------------------------|
| No screening                      | 0                   | 0          |                  |                   |      | 0                      |
| VIA                               | 257                 | 4383       | 4383             | 257               | 17   | 17.05                  |
| Pap 1                             | 298                 | 38915      | 34533            | 41                | 845  | 130.63                 |
| HPV                               | 361                 | 115610     | dom.             | dom.              |      | 320.09                 |
| Pap 2                             | 373                 | 69865      | 30950            | 75                | 414  | 187.52                 |

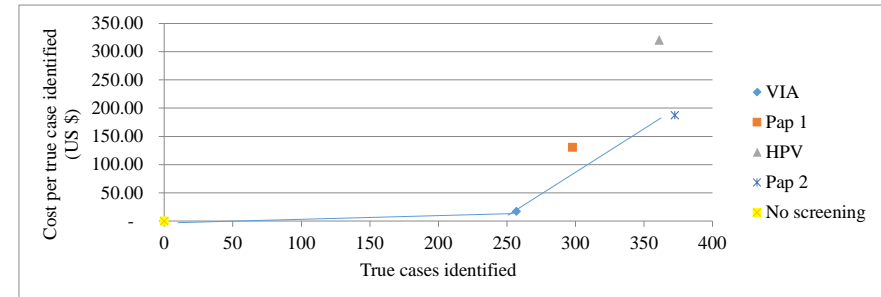

S Table 5c. Cost per case detected - option 2 - ICER CALCULATION STEP 3

| Cost per case detected - option 2 | True cases detected | total cost | incremental cost | incremental cases | icer | Cost per case detected |
|-----------------------------------|---------------------|------------|------------------|-------------------|------|------------------------|
| No screening                      | 0                   | 0          | 0                | 0                 | 0    | 0                      |
| VIA                               | 257                 | 4383       | 4383             | 257               | 17   | 17.05                  |
| Pap 1                             | 298                 | 38915      | 34533            | 41                | 845  | 130.63                 |
| Pap 2                             | 373                 | 69865      | 30950            | 75                | 414  | 187.52                 |

S Table 6. Cost per case detected - option 2 - VIA vs Pap 2 comparison/ranking

|              | True cases detected | total cost | incremental cost | incremental cases | icer | Cost per case detected |
|--------------|---------------------|------------|------------------|-------------------|------|------------------------|
| No screening | 0                   | 0          | 0                | 0                 | 0    | 0                      |
| VIA (nurse)  | 257                 | 4383       | 4383             | 257               | 17   | 17.05                  |
| Pap 2        | 373                 | 69865      | 65482            | 116               | 567  | 187.52                 |
